# Supplementary material for: What Does the Curriculum Say? Review of the Particle Physics Content in 27 High-School Physics Curricula
Source: MDPI journal article supplement (doi:10.3390/physics4040082), 2022-10-20
Supplement: s1 [file s1]

Table S2. Overview of the particle physics topics covered in the high-school curriculum documents.

|                         |                        |                      | Curricula <b>with</b> a dedicated particle physics chapter |    |        |    |       |    |    |       |    |    |    |    | Curricula <b>without</b> a dedicated particle physics chapter |       |       |    |       |    |    |    |    |    |    |    |    |    |    |   |
|-------------------------|------------------------|----------------------|------------------------------------------------------------|----|--------|----|-------|----|----|-------|----|----|----|----|---------------------------------------------------------------|-------|-------|----|-------|----|----|----|----|----|----|----|----|----|----|---|
| Category                | Topic                  | Concept              | IB                                                         | AT | AU-QLD | HR | DE-BB | IL | RU | CH-NW | SR | SA | ES | UK | BR                                                            | CA-MB | DE-BW | FR | DE-SN | GH | GR | IT | LB | NL | PL | SK | SI | SE | US |   |
| Other curricular topics | Mechanics              | Linear motion        | ■                                                          | ■  | ■      | ■  |       | ■  | ■  | ■     | ■  | ■  | ■  | ■  | ■                                                             | ■     | ■     | ■  | ■     | ■  | ■  | ■  | ■  | ■  | ■  | ■  | ■  | ■  | ■  |   |
|                         |                        | Circular motion      | ■                                                          | ■  | ■      | ■  | ■     | ■  | ■  | ■     | ■  |    | ■  | ■  | ■                                                             | ■     | ■     | ■  | ■     | ■  | ■  | ■  | ■  | ■  | ■  | ■  | ■  | ■  | ■  |   |
|                         | Gravity                | Newtonian gravity    | ■                                                          | ■  | ■      | ■  | ■     | ■  | ■  | ■     | ■  | ■  | ■  | ■  | ■                                                             | ■     | ■     | ■  | ■     | ■  | ■  | ■  | ■  | ■  | ■  | ■  | ■  | ■  | ■  |   |
|                         |                        | Einsteinian gravity  | ■                                                          | ■  |        |    | ■     |    |    |       |    | ■  | ■  |    |                                                               |       |       |    |       | ■  |    |    |    |    |    |    |    | ■  |    |   |
|                         | Conservation laws (of) | Energy               | ■                                                          | ■  | ■      | ■  | ■     | ■  | ■  | ■     | ■  | ■  | ■  | ■  | ■                                                             | ■     | ■     | ■  | ■     | ■  | ■  | ■  | ■  | ■  | ■  | ■  | ■  | ■  | ■  |   |
|                         |                        | Linear momentum      | ■                                                          | ■  | ■      | ■  | ■     | ■  | ■  | ■     | ■  | ■  | ■  |    | ■                                                             | ■     | ■     | ■  |       | ■  | ■  | ■  | ■  |    | ■  | ■  | ■  | ■  | ■  |   |
|                         |                        | Angular momentum     | ■                                                          | ■  |        |    |       |    |    |       | ■  | ■  |    |    |                                                               |       |       |    |       |    |    | ■  | ■  | ■  |    | ■  | ■  | ■  |    |   |
|                         |                        | Charges              | ■                                                          |    | ■      | ■  |       |    |    | ■     |    |    | ■  |    | ■                                                             |       |       |    |       |    |    |    | ■  | ■  |    | ■  |    | ■  |    |   |
|                         | Thermodynamics         | Particle model       | ■                                                          | ■  | ■      | ■  | ■     | ■  | ■  | ■     | ■  | ■  | ■  |    | ■                                                             | ■     | ■     |    | ■     | ■  | ■  | ■  | ■  | ■  | ■  | ■  | ■  | ■  | ■  |   |
|                         |                        | Phase transitions    | ■                                                          |    | ■      | ■  |       |    |    | ■     | ■  | ■  | ■  |    |                                                               | ■     |       |    | ■     | ■  | ■  | ■  |    | ■  |    | ■  |    | ■  | ■  |   |
|                         |                        | Vacuum               | ■                                                          |    | ■      |    |       |    |    | ■     |    | ■  | ■  | ■  | ■                                                             |       |       |    |       |    | ■  |    |    | ■  |    |    |    | ■  | ■  |   |
|                         | Electromagnetism (EM)  | Electric fields      | ■                                                          | ■  | ■      | ■  | ■     | ■  | ■  | ■     | ■  | ■  | ■  | ■  | ■                                                             | ■     | ■     | ■  | ■     | ■  | ■  | ■  | ■  | ■  | ■  | ■  |    | ■  | ■  | ■ |
|                         |                        | Magnetic fields      | ■                                                          | ■  | ■      | ■  | ■     | ■  | ■  | ■     | ■  | ■  | ■  | ■  | ■                                                             | ■     | ■     | ■  |       | ■  | ■  | ■  | ■  | ■  | ■  | ■  | ■  | ■  | ■  |   |
|                         |                        | Magnetic force       | ■                                                          |    | ■      | ■  | ■     | ■  | ■  | ■     | ■  | ■  | ■  | ■  | ■                                                             |       |       | ■  | ■     | ■  | ■  | ■  | ■  | ■  | ■  | ■  | ■  | ■  |    |   |
|                         |                        | Ionisation           |                                                            |    |        | ■  | ■     |    |    | ■     | ■  |    |    |    | ■                                                             | ■     | ■     | ■  |       | ■  | ■  |    |    |    | ■  | ■  |    | ■  | ■  |   |
|                         |                        | EM waves             | ■                                                          | ■  | ■      | ■  | ■     | ■  | ■  | ■     | ■  | ■  | ■  | ■  | ■                                                             | ■     | ■     | ■  | ■     |    |    | ■  | ■  | ■  | ■  |    |    | ■  | ■  |   |
|                         |                        | Superconductivity    | ■                                                          |    | ■      | ■  |       |    |    | ■     |    | ■  |    |    |                                                               |       |       |    |       | ■  |    |    |    |    | ■  |    |    |    |    |   |
|                         | Radiation              | Cosmic radiation     |                                                            |    | ■      | ■  |       |    |    |       | ■  | ■  |    |    |                                                               |       |       |    |       | ■  |    |    |    |    |    |    |    |    | ■  | ■ |
|                         |                        | Alpha R.             | ■                                                          |    | ■      | ■  | ■     | ■  | ■  | ■     |    | ■  | ■  | ■  | ■                                                             | ■     | ■     | ■  | ■     | ■  | ■  |    | ■  | ■  | ■  | ■  | ■  | ■  |    |   |
|                         |                        | Beta R.              | ■                                                          |    | ■      | ■  | ■     | ■  | ■  | ■     |    |    | ■  | ■  | ■                                                             | ■     | ■     | ■  | ■     | ■  | ■  |    | ■  | ■  | ■  | ■  | ■  | ■  |    |   |
|                         |                        | Gamma R.             | ■                                                          |    | ■      | ■  | ■     | ■  | ■  | ■     |    | ■  | ■  | ■  | ■                                                             | ■     | ■     | ■  | ■     | ■  | ■  |    | ■  | ■  | ■  | ■  | ■  | ■  |    |   |
|                         |                        | Radiation (general)  | ■                                                          | ■  | ■      | ■  | ■     | ■  | ■  | ■     | ■  | ■  | ■  | ■  | ■                                                             | ■     | ■     | ■  | ■     | ■  | ■  |    | ■  | ■  | ■  | ■  | ■  | ■  | ■  | ■ |
|                         | Special relativity     | Relativistic motion  | ■                                                          | ■  | ■      | ■  | ■     | ■  | ■  | ■     | ■  | ■  | ■  | ■  | ■                                                             |       |       |    |       | ■  |    |    | ■  | ■  | ■  | ■  |    | ■  | ■  |   |
|                         |                        | E=mc <sup>2</sup>    | ■                                                          | ■  | ■      | ■  | ■     |    | ■  | ■     | ■  | ■  | ■  | ■  | ■                                                             | ■     | ■     |    | ■     | ■  | ■  |    | ■  | ■  | ■  | ■  | ■  | ■  | ■  |   |
|                         | Quantum physics (QP)   | Quantum effects      | ■                                                          |    |        |    | ■     |    |    |       |    |    |    |    |                                                               |       |       | ■  |       | ■  |    |    |    |    | ■  |    |    |    | ■  |   |
|                         |                        | Probability in QP    | ■                                                          | ■  | ■      | ■  | ■     | ■  | ■  |       |    | ■  | ■  | ■  | ■                                                             | ■     | ■     | ■  |       | ■  | ■  |    | ■  |    | ■  | ■  |    | ■  | ■  | ■ |
|                         |                        | Atomic models        | ■                                                          | ■  | ■      | ■  | ■     | ■  | ■  | ■     | ■  | ■  | ■  | ■  | ■                                                             | ■     | ■     | ■  | ■     | ■  | ■  | ■  |    | ■  | ■  | ■  | ■  | ■  | ■  | ■ |
|                         |                        | Atomic energy levels | ■                                                          | ■  | ■      | ■  | ■     | ■  | ■  | ■     |    | ■  | ■  | ■  | ■                                                             | ■     |       |    | ■     | ■  | ■  | ■  | ■  | ■  |    | ■  | ■  | ■  | ■  | ■ |
|                         |                        | Quantum mechanics    | ■                                                          | ■  | ■      |    | ■     | ■  | ■  | ■     | ■  | ■  |    | ■  | ■                                                             | ■     |       |    | ■     | ■  | ■  | ■  |    | ■  | ■  | ■  |    | ■  | ■  |   |

| Category             | Topic                                      | Concept                 | IB | AT | AU-QLD | HR | DE-BB | IL | RU | CH-NW | SR | SA | ES | UK | BR | CA-MB | DE-BW | FR | DE-SN | GH | GR | IT | LB | NL | PL | SK | SI | SE | US |   |
|----------------------|--------------------------------------------|-------------------------|----|----|--------|----|-------|----|----|-------|----|----|----|----|----|-------|-------|----|-------|----|----|----|----|----|----|----|----|----|----|---|
| Particle physics     | Cosmology                                  | Big Bang                | ■  | ■  | ■      | ■  |       |    |    |       |    |    |    |    | ■  |       | ■     | ■  | ■     |    |    | ■  | ■  |    | ■  |    |    | ■  | ■  |   |
|                      |                                            | Inflation               |    | ■  |        | ■  |       |    |    | ■     |    |    |    |    |    | ■     |       |    |       |    |    |    | ■  | ■  |    | ■  |    |    |    |   |
|                      |                                            | Expansion               | ■  |    | ■      | ■  |       |    |    |       |    |    | ■  |    |    |       |       |    | ■     |    |    |    | ■  | ■  |    | ■  |    |    |    | ■ |
|                      | Standard Model                             |                         | ■  | ■  | ■      |    | ■     |    |    |       | ■  | ■  | ■  |    |    |       |       |    | ■     |    |    |    |    | ■  |    |    |    |    |    | ■ |
|                      | Fundamental interactions                   | EM interaction          | ■  |    | ■      | ■  | ■     |    |    | ■     |    | ■  | ■  | ■  |    | ■     |       |    | ■     | ■  | ■  |    |    | ■  |    | ■  |    | ■  | ■  | ■ |
|                      |                                            | Strong interaction      | ■  |    | ■      | ■  | ■     | ■  | ■  | ■     |    | ■  | ■  | ■  |    | ■     |       |    |       |    |    |    |    | ■  |    |    |    |    | ■  |   |
|                      |                                            | Weak interaction        | ■  |    | ■      | ■  | ■     | ■  |    | ■     |    | ■  | ■  | ■  |    | ■     |       |    |       |    |    |    |    |    |    |    |    |    | ■  |   |
|                      |                                            | Gravity in PP           | ■  |    |        |    |       |    |    | ■     |    | ■  |    | ■  |    |       |       |    |       |    |    |    |    |    |    |    |    |    |    |   |
|                      | Charges                                    | Electric charge         | ■  | ■  | ■      | ■  | ■     |    |    | ■     | ■  | ■  | ■  | ■  | ■  | ■     | ■     |    | ■     | ■  | ■  | ■  |    | ■  | ■  | ■  | ■  | ■  |    | ■ |
|                      |                                            | Strong charge           |    |    |        |    |       |    |    |       |    |    |    |    |    |       |       |    |       |    |    |    |    |    |    |    |    |    |    |   |
|                      |                                            | Weak charge             |    |    |        |    |       |    |    |       |    |    |    |    |    |       |       |    |       |    |    |    |    |    |    |    |    |    |    |   |
|                      | Elementary particles                       | Quarks                  | ■  |    | ■      | ■  |       | ■  | ■  |       |    | ■  | ■  | ■  | ■  | ■     |       | ■  |       |    |    |    |    | ■  |    |    |    |    | ■  |   |
|                      |                                            | Leptons                 | ■  |    | ■      | ■  | ■e    | ■  | ■  |       |    | ■  | ■  | ■  | ■  |       | ■     | ■  | ■e    | ■  |    | ■e |    | ■e | ■e | ■e |    | ■e | ■e |   |
|                      | Interaction particles                      | Bosons                  | ■  |    | ■      | ■p | ■p    |    |    | ■     |    | ■  | ■  |    | ■  |       |       |    | ■p    | ■p |    |    |    |    | ■p | ■p | ■p | ■p | ■  |   |
|                      | Brout-Englert-Higgs mechanism              |                         | ■  |    | ■      |    |       |    |    |       |    |    |    | ■  |    |       |       |    |       |    |    |    |    |    |    |    |    |    |    |   |
|                      | Particle transformations                   |                         | ■  |    | ■      |    |       |    |    |       |    | ■  | ■  | ■  | ■  |       |       |    |       |    | ■  |    |    |    |    | ■  | ■  |    | ■  |   |
|                      | Feynman diagrams                           |                         | ■  |    | ■      |    |       |    |    |       |    | ■  |    |    |    |       |       |    |       |    |    |    |    |    |    |    |    |    |    |   |
|                      | Antimatter research                        |                         | ■  |    | ■      | ■  |       |    |    |       |    | ■  | ■  | ■  | ■  |       |       |    |       |    |    |    |    |    | ■  | ■  | ■  |    | ■  |   |
|                      | Particle accelerators                      | Linear accelerator      |    |    |        |    |       |    |    |       |    |    | ■  |    |    |       |       |    | ■     | ■  |    |    |    |    |    |    |    | ■  |    |   |
|                      |                                            | Circular accelerator    | ■  |    | ■      | ■  |       |    |    |       |    |    | ■  | ■  |    |       |       |    |       | ■  |    |    |    | ■  |    |    |    | ■  |    |   |
|                      |                                            | Particle acc. (general) | ■  |    | ■      | ■  | ■     |    | ■  |       |    | ■  | ■  |    |    |       |       |    |       | ■  |    |    |    | ■  |    |    |    |    |    |   |
|                      | Particle detector                          | Historical detectors    |    |    |        |    | ■     |    |    |       |    |    |    |    |    |       |       |    |       | ■  |    |    |    |    |    |    |    |    |    |   |
|                      |                                            | Modern detectors        |    |    |        |    |       |    |    |       |    |    |    |    |    |       |       |    |       |    |    |    |    |    |    |    |    |    |    |   |
|                      |                                            | Particle det. (general) | ■  |    |        |    |       |    | ■  |       |    | ■  |    |    |    |       |       |    |       |    |    |    |    | ■  |    |    |    |    |    |   |
|                      | Data storage and data analysis             |                         | ■  |    |        |    |       |    |    |       |    |    |    | ■  |    |       | ■     |    |       |    |    |    |    |    |    |    |    |    |    | ■ |
|                      | Advances in particle physics               | Experimental results    | ■  | ■  |        |    |       |    |    |       |    |    |    | ■  |    |       |       |    |       | ■  |    |    |    |    |    |    |    |    |    |   |
|                      |                                            | Open questions          | ■  | ■  | ■      | ■  |       |    |    | ■     |    |    | ■  | ■  |    |       |       |    |       |    |    |    |    |    |    |    |    |    |    |   |
|                      | Real-life applications of particle physics |                         | ■  | ■  | ■      |    | ■     |    |    | ■     |    |    |    | ■  |    |       |       | ■  |       |    |    | ■  |    |    |    | ■  |    |    |    | ■ |
| Nature of science    |                                            |                         | ■  |    | ■      |    | ■     | ■  | ■  | ■     | ■  | ■  | ■  | ■  |    |       | ■     | ■  | ■     | ■  | ■  | ■  |    | ■  |    | ■  | ■  | ■  | ■  | ■ |
| History of (physics) | Quantum physics                            | ■                       | ■  | ■  | ■      | ■  | ■     | ■  | ■  |       |    |    | ■  | ■  |    | ■     | ■     | ■  | ■     | ■  |    |    | ■  | ■  |    | ■  | ■  |    | ■  | ■ |
|                      | Particle physics                           |                         | ■  | ■  |        |    |       |    | ■  |       |    |    |    |    |    | ■     |       |    |       |    |    |    |    |    |    |    |    |    | ■  |   |

<sup>e</sup> leptons are only mentioned in the curriculum as electrons

<sup>p</sup> interaction particles are only mentioned in the curriculum as photons
